# Supplementary material
Source: HighWire-hosted journal article supplement (https://bmjopen.bmj.com/content/11/12/e053628)
Supplement: inline-supplementary-material-2 [file inline-supplementary-material-2.pdf]

## Annex 2 – Data extraction form

## Data extraction form

| Study Characteristics |        |      |       |         |              |           |                               |
|-----------------------|--------|------|-------|---------|--------------|-----------|-------------------------------|
| #                     | Author | Year | Title | Journal | Study Design | Objective | Data origin (original / sec.) |
| 1                     |        |      |       |         |              |           |                               |

| Population |           |                    |                |        |             |                           |             |
|------------|-----------|--------------------|----------------|--------|-------------|---------------------------|-------------|
| #          | Condition | Age (range, M, SD) | Age (subgroup) | Gender | N of groups | Overall n of participants | N per group |
| 1          |           |                    |                |        |             |                           |             |

| Intervention |                        |                           |        |                      |                 |                                     |                              |                              |                                         |                             |                                  |
|--------------|------------------------|---------------------------|--------|----------------------|-----------------|-------------------------------------|------------------------------|------------------------------|-----------------------------------------|-----------------------------|----------------------------------|
| #            | Frequency and duration | Targeted (risk) behaviour | theory | Modality / procedure | N of components | Description of components (overall) | digital component (hardware) | digital component (software) | Execution (e.g. PE class, lunch breaks) | Participation of pedagogues | Participation of parents/ family |
| 1            |                        |                           |        |                      |                 |                                     |                              |                              |                                         |                             |                                  |

| Outcomes and Data Analysis |                   |                                |                         |                    |                     |     |            |                      |                |                            |  |
|----------------------------|-------------------|--------------------------------|-------------------------|--------------------|---------------------|-----|------------|----------------------|----------------|----------------------------|--|
| #                          | N of measurements | Duration follow-up (in months) | N of outcomes (overall) | Outcome 1 (Domain) | Outcome 1 (Results) | ... | comparator | Confounder variables | Matching (y/n) | Tests / analyses performed |  |
| 1                          |                   |                                |                         |                    |                     |     |            |                      |                |                            |  |

| Setting |                  |                                                                                  |
|---------|------------------|----------------------------------------------------------------------------------|
| #       | Country / region | Educational Institution (kindergarden, pre-school, elementary school, school...) |
| 1       |                  |                                                                                  |

| Implications and Notes |              |                       |                                                                      |                   |
|------------------------|--------------|-----------------------|----------------------------------------------------------------------|-------------------|
| #                      | main finding | Practical implication | Recommendations for future research (only discussion and conclusion) | Critics, notes... |
| 1                      |              |                       |                                                                      |                   |
